# Supplementary material
Source: PubMed Central journal article supplement (PMC6792358)
Supplement: ehp-127-077001-s001.pdf [file ehp-127-077001-s001.pdf]

**Note to readers with disabilities:** *EHP* strives to ensure that all journal content is accessible to all readers. However, some figures and Supplemental Material published in *EHP* articles may not conform to [508 standards](#) due to the complexity of the information being presented. If you need assistance accessing journal content, please contact [ehp508@niehs.nih.gov](mailto:ehp508@niehs.nih.gov). Our staff will work with you to assess and meet your accessibility needs within 3 working days.

### **Supplemental Material**

#### **Long-Term Particulate Matter Exposure and Onset of Depression in Middle-Aged Men and Women**

Zhenyu Zhang, Di Zhao, Yun Soo Hong, Yoosoo Chang, Seungho Ryu, Danbee Kang, Joao Monteiro, Ho Cheol Shin, Eliseo Guallar, and Juhee Cho

#### **Table of Contents**

**Table S1.** Baseline characteristics of Kangbuk Samsung Health Study (KSHS) cohort participants.

**Table S2.** Hazard ratios (95% confidence intervals) for the developing depression ( $CESD \geq 16$ ) for a  $10 \mu\text{g}/\text{m}^3$  increase in  $PM_{10}$  air pollution in the Kangbuk Samsung Health Study (KSHS).

**Figure S1.** Hazard ratio (95% confidence interval) for incident depression by level of exposure to 60-month  $PM_{10}$  concentrations. Incident depression was defined as the development of a CES-D score  $\geq 16$  over follow-up. The dose-response curve was calculated using restricted cubic splines with knots at the 5<sup>th</sup>, 35<sup>th</sup>, 65<sup>th</sup>, and 95<sup>th</sup> percentiles of the distribution of 12-month  $PM_{2.5}$  concentrations. The reference exposure level was set at the 10<sup>th</sup> percentile of the distribution of 12-month  $PM_{2.5}$  concentrations ( $24.63 \mu\text{g}/\text{m}^3$ ). Hazard ratios were adjusted for age, sex, study center, year of visit, educational level, smoking status, body-mass index, alcohol consumption, and physical activity. The histogram illustrates the distribution of 12-month  $PM_{2.5}$  concentrations.

**Table S1.** Baseline characteristics of Kangbuk Samsung Health Study (KSHS) cohort participants.

| Characteristic                                          | Participant with CES-D | Participant without CES-D | P value |
|---------------------------------------------------------|------------------------|---------------------------|---------|
| N                                                       | 123,045                | 10,295                    |         |
| Age (year)                                              | 39.4 (6.8)             | 46.7 (12.8)               | 0.001   |
| Male sex                                                | 73,930 (60.1)          | 4,587 (44.6)              | 0.001   |
| 12-month PM <sub>2.5</sub> average (µg/m <sup>3</sup> ) | 24.3 (1.3)             | 24.2 (1.3)                | 0.001   |
| 12-month PM <sub>10</sub> average (µg/m <sup>3</sup> )  | 50.6 (4.5)             | 51.7 (4.5)                | 0.001   |
| 60-month PM <sub>10</sub> average (µg/m <sup>3</sup> )  | 55.2 (4.0)             | 55.4 (4.8)                | 0.001   |
| BMI                                                     |                        |                           | 0.73    |
| <18.5                                                   | 6,203 (5.0)            | 506 (4.9)                 |         |
| 18.5 ≤ BMI <23                                          | 53,368 (43.4)          | 4,460 (43.3)              |         |
| 23 ≤ BMI <25                                            | 28,317 (23.0)          | 2,377 (23.1)              |         |
| ≥25                                                     | 34,870 (28.3)          | 2,922 (28.4)              |         |
| Unknown                                                 | 287 (0.2)              | 30 (0.3)                  |         |
| Smoking status                                          |                        |                           | 0.001   |
| Never smoker                                            | 54,723 (44.5)          | 4,862 (47.2)              |         |
| Former smoker                                           | 27,151 (22.1)          | 1,305 (12.7)              |         |
| Current smoker                                          | 27,095 (22.0)          | 1,730 (16.8)              |         |
| Unknown                                                 | 14,076 (11.4)          | 2,398 (23.3)              |         |
| Education                                               |                        |                           | 0.001   |
| No education                                            | 28 (0.0)               | 45 (0.4)                  |         |
| Elementary school                                       | 216 (0.2)              | 385 (3.7)                 |         |
| Middle school                                           | 527 (0.4)              | 364 (3.5)                 |         |
| High school                                             | 14,972 (12.2)          | 1,361 (13.2)              |         |
| Technical college                                       | 14,609 (11.9)          | 534 (5.2)                 |         |
| University                                              | 88,181 (71.7)          | 2,057 (20.0)              |         |
| Unknown                                                 | 4,512 (3.7)            | 5,549 (53.9)              |         |
| Alcohol intake                                          |                        |                           | 0.001   |
| None                                                    | 16,552 (13.5)          | 1,489 (14.5)              |         |
| Moderate                                                | 81,672 (66.4)          | 5,090 (49.4)              |         |
| High                                                    | 17,159 (13.9)          | 1,284 (12.5)              |         |
| Unknown                                                 | 7,662 (6.2)            | 2,432 (23.6)              |         |
| Daily physical activity                                 |                        |                           | 0.001   |
| None                                                    | 72,092 (58.6)          | 5,778 (56.1)              |         |
| Less than 3 times                                       | 40,048 (32.5)          | 2,535 (24.6)              |         |
| 3 times or more                                         | 7,554 (6.1)            | 751 (7.3)                 |         |
| Unknown                                                 | 3,351 (2.7)            | 1,231 (12.0)              |         |

Numbers in the Table are mean (SD) or count (%). <sup>a</sup> P value for differences of means of proportions comparing CES-D score ≥16 and CES-D score <16 group, calculated using one-way ANOVA for continuous variable and chi-square test for categorical variable. The data were complete for continuous variables. Alcohol intake was categorized as none, moderate drinking, excessive drinking, and unknown (>30 grams of alcohol for men and >20 grams of alcohol for women)

**Table S2.** Hazard ratios (95% confidence intervals) for the developing depression (CESD  $\geq 16$ ) for a 10  $\mu\text{g}/\text{m}^3$  increase in  $\text{PM}_{10}$  air pollution in the Kangbuk Samsung Health Study (KSHS).

| Adjustment                        | Cases/<br>Person<br>years | 12-month                                    |       | 60-month                                    |       |            |
|-----------------------------------|---------------------------|---------------------------------------------|-------|---------------------------------------------|-------|------------|
|                                   |                           | Per 10 $\mu\text{g}/\text{m}^3$<br>increase |       | Per 10 $\mu\text{g}/\text{m}^3$<br>increase |       |            |
|                                   |                           | HR                                          | 95%CI | HR                                          | 95%CI |            |
| Follow-up since 2011 <sup>a</sup> | Model 1                   | 5,807/                                      | 1.13  | 1.07, 1.21                                  | 1.09  | 1.02, 1.18 |
|                                   | Model 2                   | 158,778                                     | 1.12  | 1.05, 1.19                                  | 1.08  | 1.00, 1.16 |
| Follow-up since 2015              | Model 1                   | 2,795/                                      | 1.02  | 0.94, 1.12                                  | 1.01  | 0.91, 1.11 |
|                                   | Model 2                   | 58,371                                      | 1.02  | 0.93, 1.12                                  | 1.00  | 0.91, 1.11 |

Model 1. Adjusted for age, sex, study center, and year of visit. Model 2. Additionally, adjusted for educational level, smoking status, body-mass index, alcohol consumption, physical activity, and presence of diabetes, hypertension, and heart disease. Estimates represent HRs (95%CI) for CES-D  $\geq 16$  as a dichotomous outcome. <sup>a</sup> Use same group of participants to primary  $\text{PM}_{2.5}$  analyses.

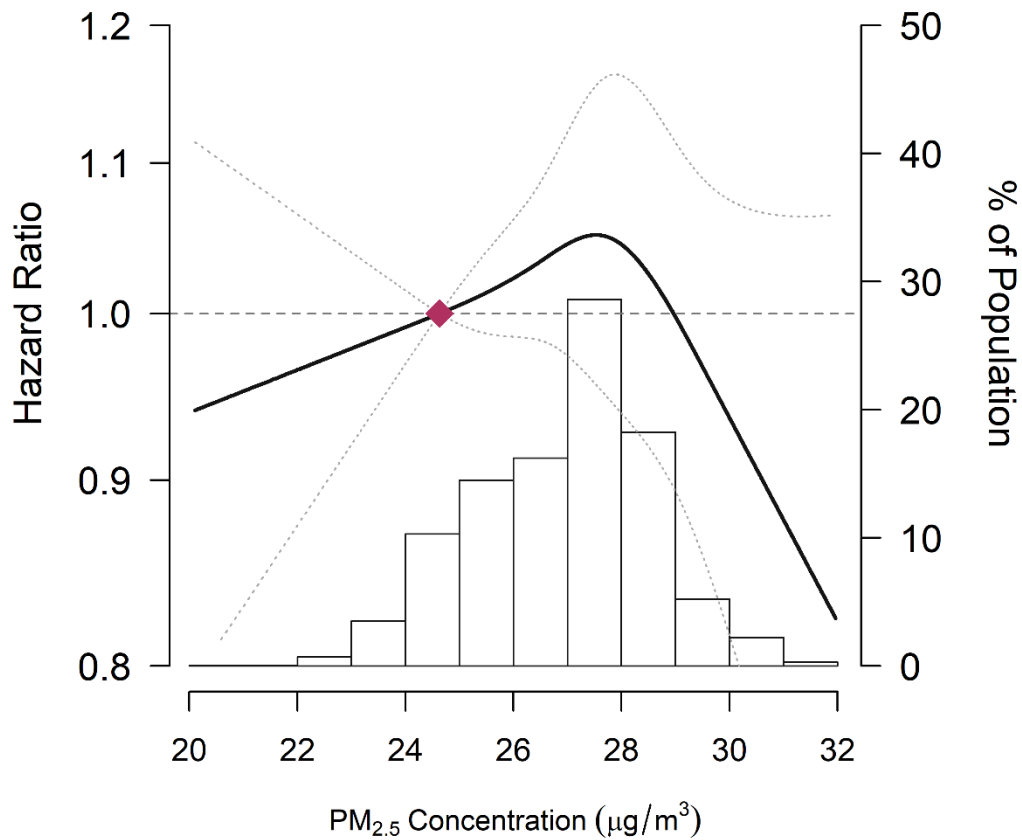

**Figure S1.** Hazard ratio (95% confidence interval) for incident depression by level of exposure to 60-month  $PM_{10}$  concentrations.

Incident depression was defined as the development of a CES-D score  $\geq 16$  over follow-up. The dose-response curve was calculated using restricted cubic splines with knots at the 5<sup>th</sup>, 35<sup>th</sup>, 65<sup>th</sup>, and 95<sup>th</sup> percentiles of the distribution of 12-month  $PM_{2.5}$  concentrations. The reference exposure level was set at the 10<sup>th</sup> percentile of the distribution of 12-month  $PM_{2.5}$  concentrations ( $24.63 \mu\text{g}/\text{m}^3$ ). Hazard ratios were adjusted for age, sex, study center, year of visit, educational level, smoking status, body-mass index, alcohol consumption, and physical activity. The histogram illustrates the distribution of 12-month  $PM_{2.5}$  concentrations.
