# Supplementary material
Source: PubMed Central journal article supplement (PMC6792358)
Supplement: ehp-127-077001-s002.pdf [file ehp-127-077001-s002.pdf]

**Note to readers with disabilities:** *EHP* strives to ensure that all journal content is accessible to all readers. However, some figures and Supplemental Material published in *EHP* articles may not conform to [508 standards](#) due to the complexity of the information being presented. If you need assistance accessing journal content, please contact [ehp508@niehs.nih.gov](mailto:ehp508@niehs.nih.gov). Our staff will work with you to assess and meet your accessibility needs within 3 working days.

### **Supplemental Material**

#### **Long-Term Particulate Matter Exposure and Onset of Depression in Middle-Aged Men and Women**

Zhenyu Zhang, Di Zhao, Yun Soo Hong, Yoosoo Chang, Seungho Ryu, Danbee Kang, Joao Monteiro, Ho Cheol Shin, Eliseo Guallar, and Juhee Cho

#### **Table of Contents**

**Table S1.** Baseline characteristics of Kangbuk Samsung Health Study (KSHS) cohort participants.

**Table S2.** Hazard ratios (95% confidence intervals) for the developing depression ( $\text{CESD} \geq 16$ ) for a  $10 \mu\text{g}/\text{m}^3$  increase in  $\text{PM}_{10}$  air pollution in the Kangbuk Samsung Health Study (KSHS).

**Figure S1.** Hazard ratio (95% confidence interval) for incident depression by level of exposure to 60-month  $\text{PM}_{10}$  concentrations. Incident depression was defined as the development of a CES-D score  $\geq 16$  over follow-up. The dose-response curve was calculated using restricted cubic splines with knots at the 5<sup>th</sup>, 35<sup>th</sup>, 65<sup>th</sup>, and 95<sup>th</sup> percentiles of the distribution of 12-month  $\text{PM}_{2.5}$  concentrations. The reference exposure level was set at the 10<sup>th</sup> percentile of the distribution of 12-month  $\text{PM}_{2.5}$  concentrations ( $24.63 \mu\text{g}/\text{m}^3$ ). Hazard ratios were adjusted for age, sex, study center, year of visit, educational level, smoking status, body-mass index, alcohol consumption, and physical activity. The histogram illustrates the distribution of 12-month  $\text{PM}_{2.5}$  concentrations.
